# Supplementary material for: Regulation of sarcomagenesis by the empty spiracles homeobox genes EMX1 and EMX2
Source: PubMed Central journal article supplement (PMC8137939; doi:10.1038/s41419-021-03801-w), 2021-05-20
Supplement: 41419_2021_3801_MOESM1_ESM.pdf [file 41419_2021_3801_MOESM1_ESM.pdf]

## **SUPPLEMENTARY INFORMATION**

**Supplementary Figure S1. Analysis of the expression levels and the methylation status of the promoter of EMX1 and EMX2 in the panel of sarcoma lines.**

**Supplementary Figure S2. Effect of EMX1 and EMX2 overexpression on the phenotype of clones in sarcoma cell models.**

**Supplementary Figure S3. Effect of the reduction of EMX1 and EMX2 on the phenotype of clones in sarcoma cell models.**

**Supplementary Figure S4. Immuno-phenotypic characterization of KI67 of the sarcomas obtained by the induction of 3MC in the KOs of Emx1 and Emx2.**

**Supplementary Figure S5. Immunophenotypic characterization of 3MC-induced sarcomas, in KO models.**

**Supplementary Figure S6. Analysis of the Prognosis value of EMX1/EMX2 genes in different public datasets.**
